# Supplementary material for: Rare-earth doped hexagonal NaYbF4 nanoprobes with size-controlled and NIR-II emission for multifunctional applications
Source: Royal Society of Chemistry journal article supplement (doi:10.1039/d3re00168g), 2023-01-01
Supplement: d3re00168g1.pdf [file d3re00168g1.pdf]

# Rare-earth doped hexagonal NaYbF<sub>4</sub> nanoprobcs with size-controlled and NIR-II emission for multifunctional application

*Yu Min<sup>a,‡</sup>, Xin Ding<sup>a,‡</sup>, Bing Yu<sup>a,b\*</sup>, Hailin Cong<sup>a,b,c\*</sup>, Youqing Shen<sup>a,d</sup>*

a. College of Chemistry and Chemical Engineering, College of Materials Science and Engineering, Institute of Biomedical Materials and Engineering, Qingdao University, Qingdao, 266071, China

b. State Key Laboratory of Bio-Fibers and Eco-Textiles, Qingdao University, Qingdao 266071, China

c. School of Materials Science and Engineering, Shandong University of Technology, Zibo 255000, China

d. Key Laboratory of Biomass Chemical Engineering of Ministry of Education, Center for Bionanoengineering, and Department of Chemical and Biological Engineering, Zhejiang University, Hangzhou, Zhejiang, 310027, China

\*Corresponding authors at: Institute of Biomedical Materials and Engineering, College of Chemistry and Chemical Engineering, Qingdao University, Qingdao, 266071, China.

E-mail addresses: yubing198@qdu.edu.cn (B Yu); conghailin@sdut.edu.cn (H Cong)

‡Equal contribution: Yu Min, Xin Ding, contributed equally to this work.

## Supporting information

**Materials:**  $\text{YbCl}_3 \cdot 6\text{H}_2\text{O}$  (99.99%),  $\text{TmCl}_3 \cdot x\text{H}_2\text{O}$  (99.99%),  $\text{GdCl}_3 \cdot 6\text{H}_2\text{O}$  (99.99%),  $\text{CeCl}_3 \cdot 7\text{H}_2\text{O}$  (99%), Oleic acid (OA, 90%), 1-Octadecene (ODE, 90%), NaOH (96%),  $\text{NH}_4\text{F}$  (98%),  $\text{Y}_2\text{O}_3$  (98%), trifluoroacetic acid (TFA, AR), distearoyl phosphatidylethanolamine-polyethylene glycol (DSPE-mPEG<sub>2000</sub>, 95%), ethanol absolute (99.7%), cyclohexane (AR). All raw materials are utilized without further treatment.

**Synthesis of  $\text{NaYbF}_4$ :2%  $\text{Tm}^{3+}$ , 30%  $\text{Gd}^{3+}$ , 2%  $\text{Ce}^{3+}$  Nanoparticles:** 0.66 mmol  $\text{YbCl}_3 \cdot 6\text{H}_2\text{O}$ , 0.02 mmol  $\text{TmCl}_3$ , 0.3 mmol  $\text{GdCl}_3 \cdot 6\text{H}_2\text{O}$ , 0.02 mmol  $\text{CeCl}_3 \cdot 7\text{H}_2\text{O}$ , 6 ml OA and 15 ml ODE were mixed together in a 250 ml round reaction flask with branch pipe, vacuumized under stirring in a high temperature rotor, heated to 150 °C for 30. A syringe was used to rapidly add 10 ml of methanol solution dissolved with NaOH (2.5 mmol) and  $\text{NH}_4\text{F}$  (4 mmol). Then vacuum and heat to 120 °C for 15 min. Then, it was heated to 290 °C for 2 h under nitrogen protection. Naturally cooled to room temperature, 20 ml ethanol was added to precipitate nanocrystals, and the products were washed with cyclohexane for many times. Then the obtained  $\text{NaYbF}_4$ : $\text{Tm}^{3+}$ ,  $\text{Gd}^{3+}$ ,  $\text{Ce}^{3+}$  core nanocrystals were dispersed in 10 ml cyclohexane as a stock solution.

**Synthesis of  $\text{NaYbF}_4$ :2%  $\text{Tm}^{3+}$ , 30%  $\text{Gd}^{3+}$ , 2%  $\text{Ce}^{3+}$ @ $\text{NaYF}_4$  nanoparticles:** First, 0.5 mmol  $\text{Y}_2\text{O}_3$  was added to a 50ml flask, and then 5 ml deionized water and 5 ml trifluoroacetic acid (TFA) were added. The solution was heated at 90 °C to be transparent, and then the solvent was evaporated at this temperature to obtain a shell precursor of calcium trifluoroacetate (( $\text{CF}_3\text{COO}$ )Y). After ( $\text{CF}_3\text{COO}$ )Y powder was

obtained, 10 mL OA, 10 mL ODE and the prepared  $\beta$ -NaYbF<sub>4</sub>:Tm<sup>3+</sup>, Gd<sup>3+</sup>, Ce<sup>3+</sup> (0.5 mmol) cyclohexane solution were added. Then vacuum degassing at 120 °C to remove water, oxygen and cyclohexane. Subsequently, the solution was heated to 300 °C at a rate of 15 K·min<sup>-1</sup> under nitrogen protection. After maintaining at 300 °C for 1 hour, the reaction was stopped and cooled to room temperature. Wash with ethanol twice, cyclohexane twice, dispersed in 10 ml cyclohexane for later use.

**Synthesis of NaYbF<sub>4</sub>:2% Tm<sup>3+</sup>, 30% Gd<sup>3+</sup>, 2% Ce<sup>3+</sup>@NaYF<sub>4</sub>@PEG nanoparticles :** In a typical process, the core-shell nanoparticles dissolved in 5ml chloroform (concentration of 1 mg/ml), add 20 mg distearoyl phosphatidylethanolamine-polyethylene glycol (DSPE-mPEG<sub>2000</sub>) mixed in a flask vigorously stirred 20 min after the evaporation of chloroform, in order to ensure that chloroform evaporated dry use 50 °C rotary evaporation. The resulting film was hydrated with 5 mL deionized water, then centrifuged and washed several times and dispersed in PBS for later use.

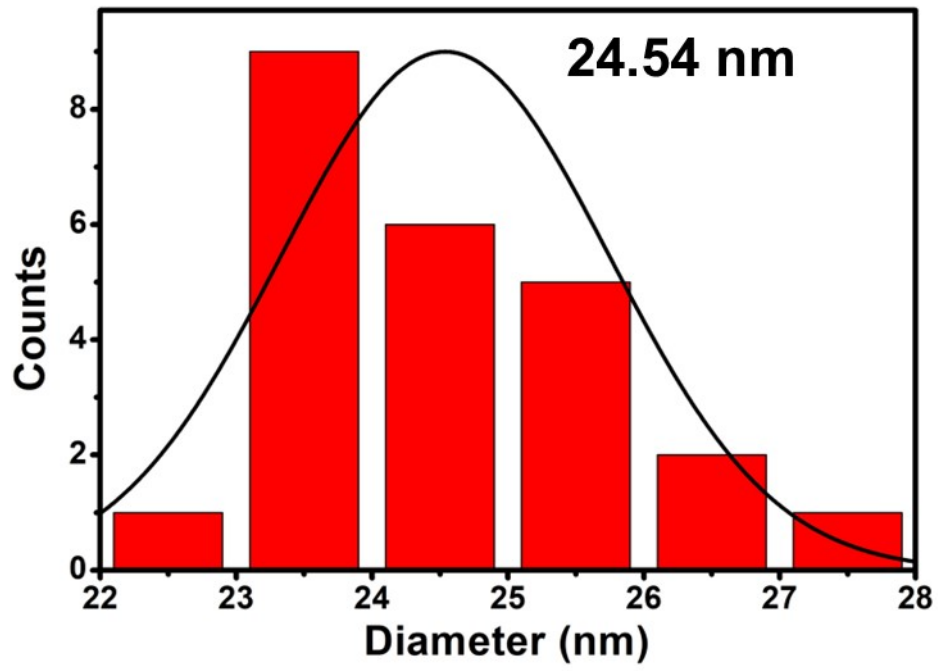

**Figure S1.** The corresponding particle size distribution of NaYbF<sub>4</sub>: 5% Tm<sup>3+</sup>, 30% Gd<sup>3+</sup>, 2% Ce<sup>3+</sup>.

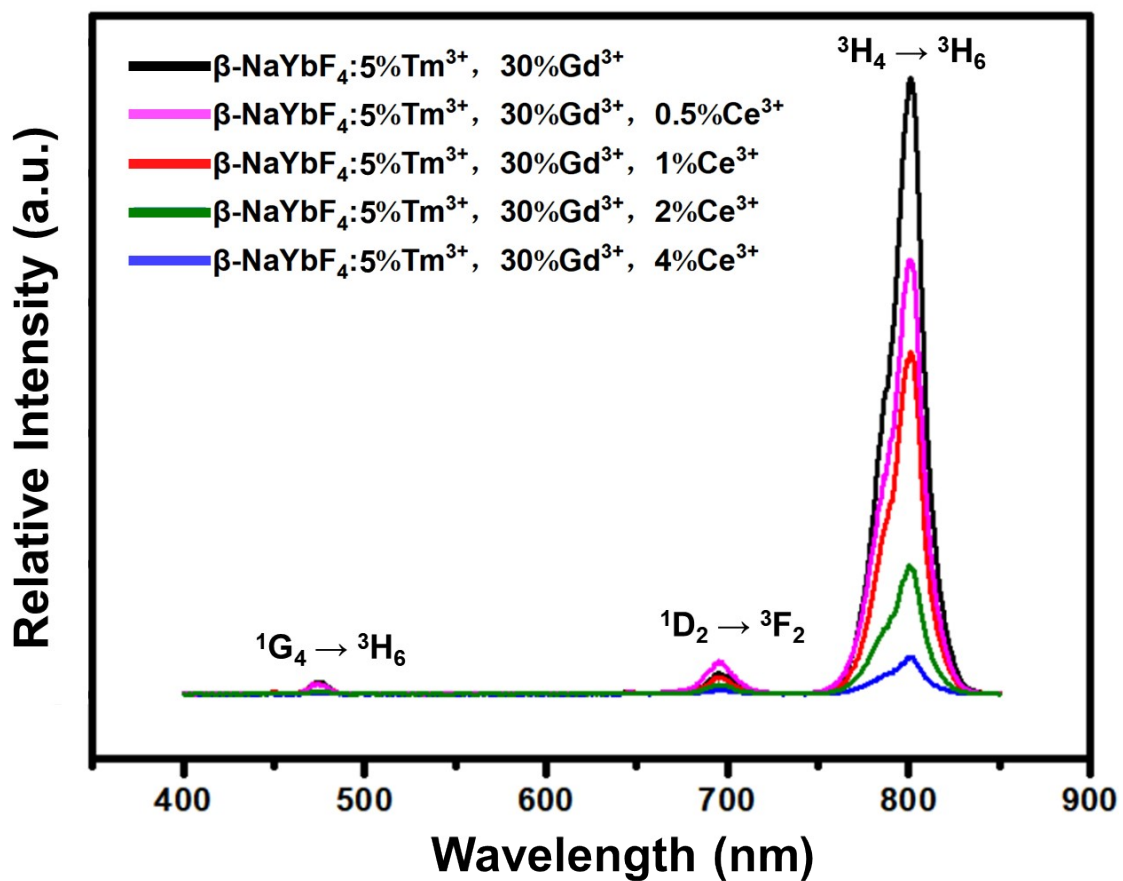

Figure S2. PL intensity of the product at 801 nm of  $\beta$ -NaYbF<sub>4</sub>: 5% Tm<sup>3+</sup>, 30% Gd<sup>3+</sup>, X% Ce<sup>3+</sup> (X = 0, 0.5, 1, 2, 4) ( $\lambda_{ex} = 980$  nm).

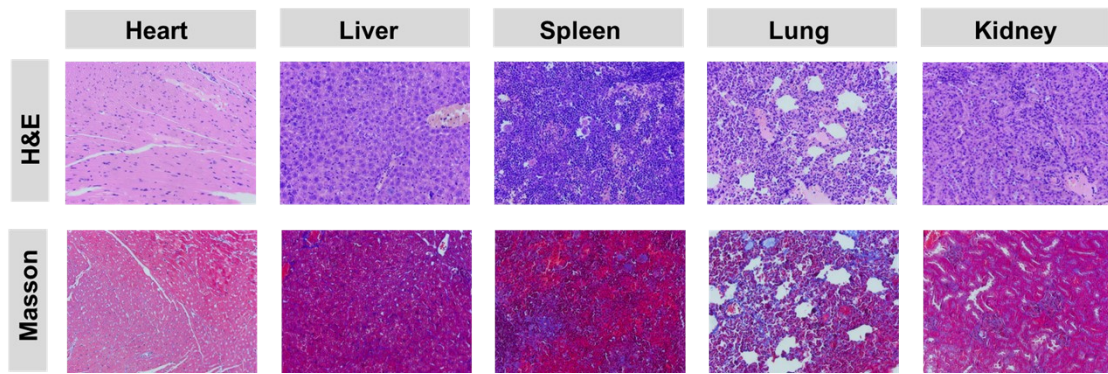

**Figure S3.** H&E staining and Masson staining images of organ sections of nude mice in control group after 14 days (tail vein injection of PBS).

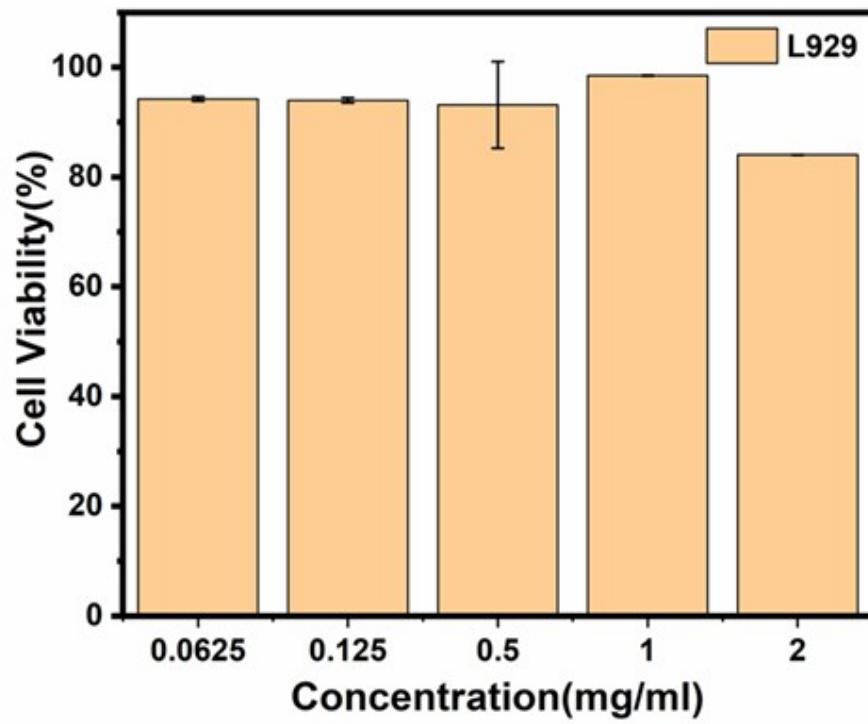

**Figure S4.** The toxicity test of NTC-PEG on L929 cells.
